# 1 Development and Validation of a Metabolite Index for Obstructive 2 Sleep Apnea across Race/Ethnicities

3 Ying Zhang<sup>1</sup>, Debby Ngo<sup>2</sup>, Bing Yu<sup>3</sup>, Neomi A. Shah<sup>4</sup>, Han Chen<sup>3,5</sup>, Alberto R. Ramos<sup>6</sup>, Phyllis C.  
4 Zee<sup>7</sup>, Russell Tracy<sup>8</sup>, Peter Durda<sup>8</sup>, Robert Kaplan<sup>9</sup>, Martha L. Daviglus<sup>10</sup>, Stephen S.  
5 Rich<sup>11</sup>, Jerome I. Rotter<sup>12</sup>, Jianwen Cai<sup>13</sup>, Clary Clish<sup>14</sup>, Robert Gerszten<sup>15</sup>, Bruce S.  
6 Kristal<sup>16,17</sup>, Sina A. Gharib<sup>18</sup>, Susan Redline<sup>17</sup>, Tamar Sofer<sup>16,19,\*</sup>

7 <sup>1</sup>Department of Medicine, Division of Sleep Medicine and Circadian Disorders, Brigham and  
8 Women's Hospital, Boston, MA, 02115, <sup>2</sup>Cardiovascular Institute, Division of Pulmonary, Critical  
9 Care and Sleep Medicine, Beth Israel Deaconess Medical Center, Boston, MA, 02215, <sup>3</sup>Human  
10 Genetics Center, Department of Epidemiology, Human Genetics and Environmental Sciences,  
11 School of Public Health, The University of Texas Health Science Center at Houston, Houston, TX,  
12 77030, <sup>4</sup>Department of Medicine, Albert Einstein College of Medicine, New York, NY,  
13 10029, <sup>5</sup>Center for Precision Health, School of Biomedical Informatics, The University of Texas  
14 Health Science Center at Houston, Houston, TX, 77030, <sup>6</sup>Department of Neurology, Sleep  
15 Medicine Program, University of Miami Miller School of Medicine, Miami, FL,  
16 33136, <sup>7</sup>Department of Neurology, Division of Sleep Medicine, Northwestern University,  
17 Chicago, IL, 60611, <sup>8</sup>Department of Pathology Laboratory Medicine, Larner College of Medicine,  
18 University of Vermont, Burlington, VT, 05405, <sup>9</sup>Department of Epidemiology & Population  
19 Health, Albert Einstein College of Medicine, Bronx, NY, 10461, <sup>10</sup>Department of Preventive  
20 Medicine, Northwestern University Feinberg School of Medicine, Chicago, IL, 60612, <sup>11</sup>Center  
21 for Public Health Genomics, University of Virginia, Charlottesville, VA, 22908, <sup>12</sup>Department of

22 Pediatrics, The Institute for Translational Genomics and Population Sciences, The Lundquist  
23 Institute for Biomedical Innovation at Harbor-UCLA Medical Center, Torrance, CA,  
24 90502, <sup>13</sup>Department of Biostatistics, Collaborative Studies Coordinating Center, University of  
25 North Carolina at Chapel Hill, Chapel Hill, NC, 27599, <sup>14</sup>Metabolite Profiling Platform, Broad  
26 Institute of MIT and Harvard, Cambridge, MA, 02142, <sup>15</sup>Cardiovascular Research Center,  
27 Massachusetts General Hospital, Harvard Medical School, Boston, MA, 02115, <sup>16</sup>Department of  
28 Medicine, Sleep and Circadian Disorders, Harvard Medical School, Boston, MA,  
29 02115, <sup>17</sup>Department of Medicine, Division of Sleep Medicine and Circadian Disorders, Brigham  
30 and Women's Hospital and Harvard Medical School, Boston, MA, 02115, <sup>18</sup>Department of  
31 Medicine, Division of Pulmonary, Critical Care, and Sleep Medicine, University of Washington,  
32 Seattle, WA, 98195, <sup>19</sup>Department of Biostatistics, Harvard T.H. Chan School of Public Health,  
33 Boston, MA, 02115

34

35 \*Corresponding Author

36 Email: [tsofer@bwh.harvard.edu](mailto:tsofer@bwh.harvard.edu) (TS)

37

38

### 39 Author's contributions

40 Conception: D.N, T.S., Y.Z.; MESA Metabolomics measurement and study design: D.N., R.G.,  
41 C.C., S.S.R., J.I.R.; HCHS/SOL metabolomics measurement and study design: B.Y.; Sleep data

- 42 collection: S.R.; Data analysis: Y.Z., T.S.; MESA data collection: S.S.R., J.I.R.; HCHS/SOL data
- 43 collection: P.C.Z., R.K., M.D., J.C.; Results interpretation and critical review of manuscript:
- 44 Everyone.

## 45 Abstract

46

47 **Background:** Obstructive sleep apnea (OSA) is a common disorder characterized by recurrent  
48 episodes of upper airway obstruction during sleep resulting in oxygen desaturation and sleep  
49 fragmentation, and associated with increased risk of adverse health outcomes. Metabolites are  
50 being increasingly used for biomarker discovery and evaluation of disease processes and  
51 progression. Studying metabolomic associations with OSA in a diverse community-based cohort  
52 may provide insights into the pathophysiology of OSA. We aimed to develop and replicate a  
53 metabolite index for OSA and identify individual metabolites associated with OSA.

54 **Methods and Findings:** We studied 219 metabolites and their associations with the apnea  
55 hypopnea index (AHI) and with moderate-severe OSA ( $AHI \geq 15$ ) in the Hispanic Community  
56 Health Study/Study of Latinos (HCHS/SOL) ( $n=3507$ ) using two methods: (1) association analysis  
57 of individual metabolites, and (2) least absolute shrinkage and selection operator (LASSO)  
58 regression to identify a subset of metabolites jointly associated with OSA, and develop a  
59 metabolite index for OSA. Results were validated in the Multi-Ethnic Study of Atherosclerosis  
60 (MESA) ( $n=475$ ). When assessing the associations with individual metabolites, we identified  
61 seven metabolites significantly positively associated with OSA in HCHS/SOL ( $FDR p < 0.05$ ), of  
62 which four associations - glutamate, oleoyl-linoleoyl-glycerol (18:1/18:2), linoleoyl-linoleoyl-  
63 glycerol (18:2/18:2) and phenylalanine, replicated in MESA (one sided- $p < 0.05$ ). The OSA  
64 metabolite index, composed of 14 metabolites, was associated with 50% increase of risk for  
65 moderate-severe OSA ( $OR=1.50$  [95% CI: 1.21-1.85] per 1 SD of OSA metabolite index,  $p < .001$ )

66 in HCHS/SOL and 44% increased risk (OR=1.55 [95% CI: 1.10-2.20] per 1 SD of OSA metabolite  
67 index,  $p=0.013$ ) in MESA, both adjusted for demographics, lifestyle, and comorbidities. Similar  
68 albeit less significant associations were observed for AHI.

69 **Conclusions:** We developed a metabolite index that replicated in an independent multi-ethnic  
70 dataset, demonstrating the robustness of metabolomic-based OSA index to population  
71 heterogeneity. Replicated metabolite associations may provide insights into OSA-related  
72 molecular and metabolic mechanisms.

73

## 74 Introduction

75           Obstructive sleep apnea (OSA) is a common disorder characterized by recurrent  
76 episodes of upper airway obstruction during sleep resulting in oxygen desaturation and sleep  
77 fragmentation (1). While highly prevalent in the population (2), OSA is severely under-  
78 diagnosed (3), especially in women (4). For example, only 1.3% of participants in the Hispanic  
79 Community Health Study/Study of Latinos (HCHS/SOL) and 7-15% of participants in the Multi-  
80 Ethnic Study of Atherosclerosis (MESA) reported a previous OSA diagnosis; in MESA,  
81 underdiagnosis was highest among race/ethnic minorities (5,6). The pathophysiology  
82 underlying OSA is multifaceted, which includes obesity, craniofacial structure, upper airway  
83 neuronal control, ventilatory control, and inflammation, among others (7). OSA is also  
84 associated with increased risk of adverse health outcomes, including hypertension,  
85 cardiovascular disease, diabetes, and early mortality (8–11).

86

87 Metabolomics is the study of small biochemical compounds at large scales (12). As a growing  
88 number of large metabolomics datasets become available, metabolites are being increasingly  
89 leveraged for biomarker discovery and evaluation of disease processes and progression (13,14).  
90 In particular, studying metabolite associations with OSA may improve our understanding of the  
91 pathophysiology of OSA. However, research in this area has been limited by the relatively small  
92 number of participants that have undergone both overnight sleep studies and metabolomic  
93 profiling, the lack of representativeness of the study subjects selected solely in clinical

94 encounters, and the limited metabolite panels used by many targeted metabolomics platforms  
95 (15,16).

96 Here, we study metabolite associations with OSA in the HCHS/SOL, one of the largest multi-  
97 center cohorts with diverse participants from a rapidly growing minority group in the US:  
98 Hispanics/Latinos. We then test these associations for replication in MESA, a multi-ethnic  
99 community-based cohort. Our study follows the design described in **Figure 1**. First, we study  
100 associations of individual metabolites with a measure of moderate to severe OSA, defined by  
101 the apnea hypopnea index  $AHI \geq 15$ , as well as by associations with continuously measured  
102 AHI. Next, we develop a metabolite index for OSA by aggregating together multiple metabolites  
103 as a potential biomarker for OSA. We then validate its association with OSA in MESA. This  
104 process is repeated for a continuous measure of OSA severity, the AHI. Because OSA has  
105 different characteristics across sexes (17), in secondary analyses we additionally studied sex-  
106 specific metabolite indices.

107

**Figure 1: Study design flow chart.**

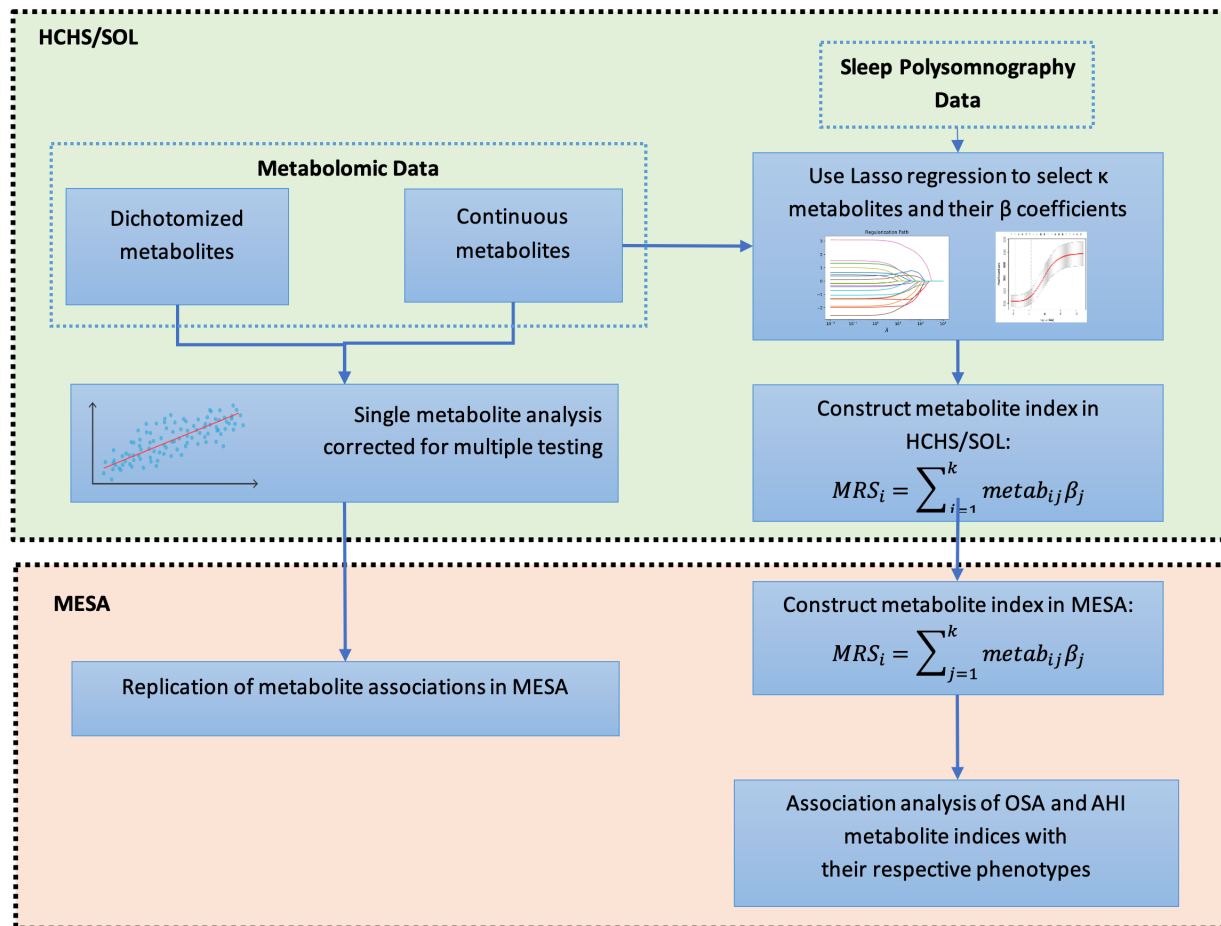

Definition of abbreviations: LASSO = least absolute shrinkage and selection operator, HCHS/SOL= the Hispanic Community Health Study/Study of Latinos, MESA= the Multi-Ethnic Study of Atherosclerosis.

108

## 109 **Methods**

### 110 **The Hispanic Community Health Study/Study of Latinos**

111 The HCHS/SOL is a community-based cohort study of 16,415 self-identified Hispanic/Latino  
 112 persons from diverse Hispanic/Latino backgrounds (Mexicans, Puerto Ricans, Cubans, Central  
 113 Americans, Dominicans, and South Americans) (18). Participants 18–74 years of age at their



114 baseline examination were recruited through a stratified multistage area probability sample  
115 design from four communities: San Diego, California; Chicago, Illinois; The Bronx, New York; and  
116 Miami, Florida. The baseline examinations occurred in June 2008–July 2011 and included  
117 assessment of OSA using a validated Type 3 home sleep apnea test (ARES Unicorder 5.2; B-  
118 Alert, Carlsbad, CA) that measured nasal air-flow, position, snoring, heart rate and  
119 oxyhemoglobin saturation (19) as previously described (5) in 14,440 individuals. The current  
120 cross-sectional analysis included 3,507 of these participants who also had blood assessed for  
121 metabolomic measures. Our primary analysis focused on a metabolomics-based biomarker for  
122 moderate or severe OSA defined as  $AHI \geq 15$ , with events defined as apneas or hypopneas with  
123 at least 50% cannula flow reduction for a minimum duration of 10 seconds, with  $\geq 3\%$  oxygen  
124 desaturation. The sleep study was conducted within the week following the baseline exam in  
125 which blood was collected and used for metabolite quantification. The study was approved by  
126 Institutional Review Boards at each field center where all participants provided written consent,  
127 and by the study's Reading and Data Coordinating Centers.

128

## 129 HCHS/SOL Metabolomic Profiling

130 Fasting blood samples were collected at the baseline examination. Of all HCHS/SOL participants  
131 from the baseline examination who also had genetic data, 3,968 individuals were selected at  
132 random for metabolomics assessment. The samples were processed, and serum was stored at  
133  $-70^{\circ}\text{C}$  since collection. The metabolomic profiling was conducted at Metabolon (Durham, NC)  
134 with Discovery HD4 platform in 2017. Serum metabolites were quantified with untargeted,  
135 liquid chromatography-mass spectrometry (LC-MS)-based quantification protocol (20).-The

136 platform captured a total of 1,136 metabolites, including 782 known and 354 unknown  
137 (unidentified) metabolites.

138

## 139 The Multi-Ethnic Study of Atherosclerosis

140 MESA is a cohort study designed to study risk factors for clinical and subclinical cardiovascular  
141 diseases in four racial/ ethnic groups (21). The study began in July 2000 and recruited 6,814  
142 adults free of clinical CVD and aged 45–84 years from 6 centers: Baltimore, MD; Chicago, IL; Los  
143 Angeles, CA; New York, NY; Saint Paul, MN; and Winston-Salem, NC. Participants were  
144 continued to be studied through subsequent follow-up exams. Of the 4,077 participants who  
145 attended Exam 5 (2010-2012), 2,261 participated in the MESA Sleep ancillary study (2010-  
146 2013). As reported before (6), participants in the Sleep Exam were generally similar to non-  
147 participants. OSA was assessed with Type II in-home polysomnography. AHI was defined as the  
148 total number of apnea and hypopneas with at least 30% reduction in the nasal flow signal and  
149 with  $\geq 3\%$  oxygen desaturation per hour of sleep. The median time interval between Exam 5  
150 fasting plasma sample collection and MESA Sleep was 301 days (range 0–1,024 days).  
151 Metabolomic data was collected on 1,000 randomly selected participants from Exam 5. Of  
152 these, 475 participants also had sleep measures and are included in this analysis. Local  
153 institutional review boards at all the participating institutions approved study protocols, and all  
154 participants gave written informed consent.

155

## 156 MESA Metabolomic Profiling

157 Metabolite profiling was performed using liquid chromatography tandem mass spectrometry  
158 (LC-MS). Positive ion mode profiling of water-soluble metabolites and lipids was performed  
159 using LC-MS systems comprised of Nexera X2 U-HPLC (Shimadzu Corp.; Marlborough, MA) units  
160 coupled to a Q Exactive mass spectrometer (Thermo Fisher Scientific; Waltham, MA). Polar  
161 metabolites were analyzed using hydrophilic interaction liquid chromatography (HILIC) and  
162 lipids were analyzed separately using reversed phase C8 chromatography as described in detail  
163 previously (22). Raw data were processed using TraceFinder 3.1 (Thermo Fisher Scientific;  
164 Waltham, MA) and Progenesis Q1 (Nonlinear Dynamics; Newcastle upon Tyne, UK). To measure  
165 organic acids and other intermediary metabolites in negative ionization mode, chromatography  
166 was performed using an Agilent 1290 infinity LC system equipped with a Waters XBridge Amide  
167 column, coupled to an Agilent 6490 triple quadrupole mass spectrometer. Metabolite  
168 transitions were assayed using a dynamic multiple reaction monitoring system. LC-MS data  
169 were analyzed with Agilent Masshunter QQQ Quantitative analysis software. Isotope labeled  
170 internal standards were monitored in each sample to ensure proper MS sensitivity for quality  
171 control. Pooled plasma samples were interspersed at intervals of 10 participant samples for  
172 standardization of drift over time and between batches. Additionally, separate pooled plasma  
173 was interspersed at every 20 injections to determine coefficient of variation for each  
174 metabolite over the run. Peaks were manually reviewed in a blinded fashion to assess quality.  
175 For each method, metabolite identities were confirmed using authentic reference standards or  
176 reference samples. Metabolites with poor peak quality and coefficients of variation greater  
177 than 30% averaged across batches were removed from analysis.

178

## 179 Quality control of metabolites in HCHS/SOL and MESA

180 Missing metabolite values were addressed as described in **Supplemental Figure 1**. In our  
181 discovery sample (HCHS/SOL), we excluded individuals with more than 25% missing metabolite  
182 levels, and metabolites with missing values for 75% or more individuals. For metabolites with  
183 more than 25% and less than 75% missing values, values were dichotomized as “observed” and  
184 “unobserved”. For metabolites with less than 25% missing values, we imputed the missing  
185 values using the minimum observed value of the metabolite in the sample, under the  
186 assumption that metabolites were not observed due to a technical detection limit.

187

188 Because our study design includes validation analysis, we focused on metabolites available in  
189 both HCHS/SOL and MESA. Before any quality control (QC) methods were applied, 231  
190 HCHS/SOL metabolites were mapped to 294 metabolites in MESA. The mapping of MESA to  
191 HCHS/SOL metabolites as well as to RefMet ID was done at Clish Lab. MESA had multiple  
192 metabolites matched to a single HCHS/SOL metabolite in multiple instances because the same  
193 metabolite was measured via more than one platform used by MESA. In some cases, a single  
194 metabolite appears as two highly correlated ion features in the same MESA platform (e.g.,  
195 some neutral lipids were measured as both sodium and ammonium adducts). Therefore, a single  
196 feature was mapped to the metabolite in HCHS/SOL while the redundant features were dropped  
197 according to the following principles: features with redundant ions were excluded; features with  
198 lower missingness and lower skewness were prioritized. After removing 60 such redundant  
199 features in MESA and applied QC methods based on the missingness in HCHS/SOL, 219

200 HCHS/SOL metabolites were mapped to 219 metabolites in MESA. **Table S1** provides the list of  
201 the 294 initially matched metabolites cross-referenced by RefMet ID and metabolite  
202 annotations including HMDB IDs provided by Metabolon, along with details regarding  
203 metabolite-specific QC resulting in the final list of one-to-one matched metabolites. The serum  
204 concentration values of the matched metabolites that were treated as continuous were rank-  
205 normalized.

206

207 Because MESA was a validation study, we only evaluated metabolites that were identified in  
208 the association analysis in HCHS/SOL. The missing data for these metabolites were always  
209 <25%, so we treated these as continuous variables and imputed missing values with the  
210 minimum observed value in the MESA sample.

211

## 212 Statistical analysis

213 Association analyses were based on three conceptual regression models: Model 1 (i.e., primary  
214 model) adjusted for demographic variables – age, sex, study center, Hispanic background  
215 (Mexicans, Puerto Ricans, Cubans, Central Americans, Dominicans, and South Americans and  
216 other/multi), and body mass index (BMI) in HCHS/SOL; age, sex, study site (two sites with low  
217 sample sizes were combined), race (White versus “Non-White”, which consists of Hispanic, Black  
218 and Chinese Americans), and BMI in MESA. Model 2 (i.e., lifestyle model) adjusted for  
219 demographic and lifestyle variables – alcohol use, cigarette use, total physical activity (MET-  
220 min/day), and diet (Alternative Healthy Eating Index 2010) in HCHS/SOL; alcohol use and  
221 cigarette use in MESA. Model 3 (i.e., lifestyle and comorbidity model) adjusted for demographic,

222 lifestyle and comorbidity variables - indicators for diabetes, hypertension, fasting insulin, fasting  
223 glucose, HOMA-IR, HDL, LDL, total cholesterol, triglycerides, systolic blood pressure and diastolic  
224 blood pressure in HCHS/SOL; hypertension, fasting glucose, HDL, LDL, cholesterol, triglycerides,  
225 systolic blood pressure and diastolic blood pressure in MESA. All models used the same set of  
226 individuals with complete set of sleep and covariate measures.

227

## 228 Association analysis between individual metabolites and OSA and AHI

229 We tested the association of each of 219 metabolites (both continuous and dichotomized  
230 metabolites) with moderate-severe OSA and AHI in the HCHS/SOL. Each metabolite was the  
231 exposure in either linear or logistic regression (depending on the outcome) for each model. We  
232 accounted for the HCHS/SOL study design (sampling and clustering) and obtained  
233 representative effect estimates using survey regression implemented in the R survey package  
234 (4.0) (23). We controlled the false discovery rate (FDR) using the Benjamini-Hochberg  
235 procedure (24) and determined significant associations as those with FDR p-value<0.05. In the  
236 replication analysis, we tested the associations of these metabolites with OSA in logistic  
237 regression and with AHI in linear regression in MESA in models 1-3. We computed one-sided p-  
238 values guided by the estimated direction of associations in the HCHS/SOL (25), and determined  
239 replication if the one-sided p-value was <0.05.

240

## 241 LASSO regression for constructing metabolite indices

242 We applied a LASSO logistic regression with moderate to severe OSA versus no or mild OSA (for  
243 brevity “OSA versus no OSA”), and linear regression with AHI – log transformed as  $\log(\text{AHI}+1)$ ,  
244 adjusted for the covariates in Model 1 in HCHS/SOL. We included 209 continuous metabolites  
245 (not including the 10 dichotomized metabolites). We selected the LASSO tuning parameter by  
246 minimizing the misclassification error for OSA (assuming probability of 0.5 is the cutoff for  
247 “predicting” OSA), and the prediction error for AHI, in a 10-fold cross-validation. Metabolite  
248 indices were calculated as a weighted sum of the (normalized) metabolite serum  
249 concentrations, with weights being the metabolite coefficients from the LASSO regression.

250

251 To validate the metabolite index association with OSA/AHI, we constructed the indices in MESA  
252 using the weights from the LASSO regression conducted in HCHS/SOL, then assessed their  
253 associations with the corresponding sleep traits (i.e., OSA, AHI) in model 1-3. In the secondary  
254 analyses we assessed potential sex differences via: (1) sex-stratified association analysis for sex-  
255 specific metabolite indices (constructed based on sex-stratified LASSO), as well as (2) sex-  
256 stratified association analysis for metabolite indices constructed based on combined sexes. We  
257 also assessed the associations between metabolite indices quartiles and the corresponding  
258 sleep traits.

259

260 All analyses were done in R 3.6.3. The glmnet package (3.0)(26) in R was used for the LASSO  
261 logistic regression.

262

## 263 Results

### 264 Participant characteristics

265 **Table 1** characterizes the HCHS/SOL analytic sample and target population. The HCHS/SOL  
 266 cohort included 3,507 participants, with a mean age of 41.72 years (SD =15.4), of whom 50.7%  
 267 were female and 10.2% were classified with moderate or severe OSA (AHI  $\geq$  15). Participants  
 268 with OSA were more likely to be male, had a higher BMI, and were less likely to be never  
 269 smokers compared to those without OSA. Individuals with OSA were also more likely to have  
 270 co-morbidities: 60% had hypertension and 34.3% had diabetes, compared to 27.8%  
 271 hypertension and 16.9% diabetes in those without OSA. **S2 Table** characterizes the 475 MESA  
 272 participants with metabolomics, sleep, and required measured covariates from the validation  
 273 dataset. MESA participants were older (mean 68.45 years, SD=9.33), with a higher proportion of  
 274 females (56.2%). Reflecting their older age, more MESA participants had moderate or severe  
 275 OSA (46.7%) compared to HCHS/SOL.

276

277 **Table 1. Characteristics of Hispanics/Latinos represented by the HCHS/SOL study population**

| Mean (SD)             | Stratified by sex |               | Stratified by OSA status |               | Total         |
|-----------------------|-------------------|---------------|--------------------------|---------------|---------------|
|                       | Female            | Male          | AHI<15                   | AHI $\geq$ 15 |               |
| n                     | 2011              | 1496          | 3122                     | 385           | 3507          |
| Age                   | 42.22 (15.12)     | 41.20 (14.94) | 40.29 (14.60)            | 54.20 (12.91) | 41.72 (15.04) |
| Gender = Male (%)     | 0 (0.0)           | 1496 (100.0)  | 1252 (40.1)              | 244 (63.4)    | 1496 (49.3)   |
| Latino background (%) |                   |               |                          |               |               |
| Dominican             | 220 (10.9)        | 121 (8.2)     | 301 (9.6)                | 40 (10.4)     | 341 (10.7)    |
| Central American      | 205 (10.2)        | 136 (5.7)     | 304 (9.7)                | 37 (9.6)      | 341 (6.4)     |



|                                                           |                 |                 |                 |                 |                 |
|-----------------------------------------------------------|-----------------|-----------------|-----------------|-----------------|-----------------|
| Cuban                                                     | 279 (13.9)      | 279 (24.5)      | 479 (15.3)      | 79 (20.5)       | 558 (21.5)      |
| Mexican                                                   | 795 (39.5)      | 558 (35.7)      | 1221 (39.1)     | 132 (34.3)      | 1353 (36.7)     |
| Puerto Rican                                              | 334 (16.6)      | 267 (17.8)      | 535 (17.1)      | 66 (17.1)       | 601 (16.4)      |
| South American                                            | 121 (6.0)       | 86 (3.7)        | 187 (6.0)       | 20 (5.2)        | 207 (4.5)       |
| Multi                                                     | 57 (2.8)        | 49 (4.3)        | 95 (3.0)        | 11 (2.9)        | 106 (3.8)       |
| Alcohol drinking status (%)                               |                 |                 |                 |                 |                 |
| never                                                     | 512 (25.5)      | 116 (8.1)       | 568 (18.2)      | 60 (15.6)       | 628 (16.3)      |
| former                                                    | 698 (34.7)      | 447 (27.7)      | 1000 (32.0)     | 145 (37.7)      | 1145 (29.5)     |
| current                                                   | 800 (39.8)      | 933 (64.1)      | 1553 (49.8)     | 180 (46.8)      | 1733 (54.2)     |
| Smoking status (%)                                        |                 |                 |                 |                 |                 |
| never                                                     | 1382 (68.8)     | 710 (47.5)      | 1906 (61.1)     | 186 (48.3)      | 2092 (61.5)     |
| former                                                    | 320 (15.9)      | 391 (26.2)      | 589 (18.9)      | 122 (31.7)      | 711 (16.2)      |
| current                                                   | 308 (15.3)      | 394 (26.4)      | 625 (20.0)      | 77 (20.0)       | 702 (22.3)      |
| BMI                                                       | 30.02 (6.90)    | 28.81 (5.34)    | 28.99 (6.09)    | 33.24 (5.97)    | 29.43 (6.21)    |
| OSA status = OSA, AHI $\geq$ 15 (%)                       | 141 (7.0)       | 244 (16.3)      | 0 (0.0)         | 385 (100.0)     | 385 (10.2)      |
| AHI (3% desaturation)                                     | 3.64 (7.52)     | 8.01 (14.93)    | 2.60 (3.43)     | 33.80 (20.62)   | 5.79 (11.97)    |
| Overnight Hypoxemia ( $\geq$ 5% sleep $<$ 90% saturation) |                 |                 |                 |                 |                 |
|                                                           | 41 (2.0)        | 86 (5.7)        | 6 (0.2)         | 121 (31.4)      | 127 (3.2)       |
| Diabetes status (ADA) <sup>†</sup> = Yes (%)              |                 |                 |                 |                 |                 |
|                                                           | 376 (18.7)      | 283 (18.9)      | 527 (16.9)      | 132 (34.3)      | 659 (15.3)      |
| Hypertension status <sup>‡</sup> = Yes (%)                |                 |                 |                 |                 |                 |
|                                                           | 642 (31.9)      | 458 (30.6)      | 869 (27.8)      | 231 (60.0)      | 1100 (25.8)     |
| Triglycerides (mg/dL)                                     |                 |                 |                 |                 |                 |
|                                                           | 115.91 (71.29)  | 144.00 (99.29)  | 124.97 (83.48)  | 171.88 (107.33) | 129.77 (87.38)  |
| HDL (mg/dL)                                               |                 |                 |                 |                 |                 |
|                                                           | 52.51 (12.73)   | 45.18 (11.90)   | 49.44 (13.03)   | 44.06 (10.11)   | 48.89 (12.86)   |
| LDL (mg/dL)                                               |                 |                 |                 |                 |                 |
|                                                           | 119.63 (35.66)  | 122.36 (35.61)  | 120.43 (35.72)  | 125.75 (34.77)  | 120.97 (35.66)  |
| Fasting glucose (mg/dL)                                   |                 |                 |                 |                 |                 |
|                                                           | 99.99 (32.62)   | 104.72 (34.52)  | 100.92 (31.83)  | 114.64 (44.85)  | 102.33 (33.65)  |
| Fasting insulin (mU/L)                                    |                 |                 |                 |                 |                 |
|                                                           | 197.84 (147.49) | 200.34 (142.42) | 199.60 (145.42) | 194.39 (141.28) | 199.07 (145.00) |
| HOMA-IR                                                   |                 |                 |                 |                 |                 |
|                                                           | 3.39 (3.72)     | 3.48 (5.41)     | 3.17 (3.26)     | 5.77 (10.53)    | 3.43 (4.63)     |
| Total cholesterol (mg/dL)                                 |                 |                 |                 |                 |                 |
|                                                           | 195.40 (41.67)  | 196.06 (42.86)  | 194.82 (42.38)  | 203.65 (40.35)  | 195.72 (42.26)  |
| Systolic blood pressure (mmhg)                            |                 |                 |                 |                 |                 |
|                                                           | 116.13 (17.69)  | 124.17 (15.57)  | 118.73 (16.51)  | 132.07 (18.06)  | 120.09 (17.15)  |
| Diastolic blood pressure (mmhg)                           |                 |                 |                 |                 |                 |
|                                                           | 71.02 (10.53)   | 74.32 (10.92)   | 71.87 (10.60)   | 79.49 (10.61)   | 72.65 (10.85)   |

278 \* Means and percentages were weighted using sampling weights to provides estimates of the

279 HCHS/SOL target population characteristics.

280 † Baseline diabetes are based on American Diabetes Association definition (Diabetes Care 2010;33:S62-  
281 69), defined as fasting glucose  $\geq 100$  mg/dL, or post-OGTT glucose  $\geq 140$  mg/dL or A1C  $\geq 5.7\%$ , or use  
282 of anti-diabetic medication.

283 ‡ Baseline hypertension is defined as systolic or diastolic BP greater than or equal to 140/90  
284 respectively, or current use of antihypertensive medications.

285

## 286 Metabolite associations with OSA and AHI

287 **Table 2** shows the odds ratios corresponding to 7 metabolites associated (FDR  $P < 0.05$ ) with  
288 OSA in HCHS/SOL adjusted for age, sex, BMI, study site/center, race/ethnicity). **Figure 2A and**  
289 **S3 Tables** show the lifestyle adjusted model and comorbidity adjusted model results. Among  
290 the 7 mapped metabolites in MESA, 4 metabolite associations had one sided p-values  $< 0.05$  –  
291 glutamate, phenylalanine, linoleoyl-linoleoyl-glycerol (18:2/18:2), and oleoyl-linoleoyl-glycerol  
292 (18:1/18:2), all of which were associated with increased risks for OSA (**Figure 2B**). These  
293 associations also had FDR p-value  $< 0.05$  in MESA. No metabolite was associated with AHI after  
294 multiple testing correction in the HCHS/SOL (**Supplemental Figure 2**). Also, no metabolite  
295 associations were detected at the FDR  $< 0.05$  level in minimally adjusted sex-stratified analyses  
296 in HCHS/SOL.

297 **Table 2. Single metabolite associations with FDR-adjusted p-value <0.05 in the discovery step**

| Biochemical                                   | Super-pathway | Sub-pathway                   | HMDB ID   | HCHS/SOL |                      |              | MESA      |      |                      |              |               |  |
|-----------------------------------------------|---------------|-------------------------------|-----------|----------|----------------------|--------------|-----------|------|----------------------|--------------|---------------|--|
|                                               |               |                               |           | OR       | Unadj-p <sup>†</sup> | FDR p        | Platform  | OR   | Unadj-p <sup>†</sup> | 1-sided p    | 1-sided FDR p |  |
| glutamate                                     | Amino Acid    | Glutamate Metabolism          | HMDB00148 | 1.33     |                      |              |           |      |                      |              |               |  |
|                                               |               |                               |           |          | 1.36E-04             | <b>0.014</b> | Amide-neg | 1.16 | 1.11E-02             | <b>0.006</b> | <b>0.019</b>  |  |
| phenylalanine                                 | Amino Acid    | Phenylalanine Metabolism      | HMDB00159 | 1.23     |                      |              |           |      |                      |              |               |  |
|                                               |               |                               |           |          | 1.63E-03             | <b>0.049</b> | HIL-pos   | 1.17 | 3.55E-03             | <b>0.002</b> | <b>0.014</b>  |  |
| linoleoyl-linoleoyl-glycerol (18:2/18:2) [1]* | Lipid         | Diacylglycerol                | HMDB07248 | 1.25     |                      |              |           |      |                      |              |               |  |
|                                               |               |                               |           |          | 8.27E-04             | <b>0.040</b> | HIL-pos   | 1.11 | 3.47E-02             | <b>0.017</b> | <b>0.030</b>  |  |
| oleoyl-linoleoyl-glycerol (18:1/18:2) [1]     | Lipid         | Diacylglycerol                | HMDB07219 | 1.29     |                      |              |           |      |                      |              |               |  |
|                                               |               |                               |           |          | 8.90E-05             | <b>0.014</b> | HIL-pos   | 1.13 | 1.51E-02             | <b>0.008</b> | <b>0.019</b>  |  |
| 1-palmitoleoylglycerol (16:1)*                | Lipid         | Monoacylglycerol              | HMDB11565 | 1.21     | 1.15E-03             | <b>0.040</b> | C8-pos    | 0.92 | 9.96E-02             | 0.950        | 0.950         |  |
| 1-stearoyl-2-linoleoyl-GPE (18:0/18:2)*       | Lipid         | Phosphatidylethanolamine (PE) | HMDB08994 | 1.25     |                      |              |           |      |                      |              |               |  |
|                                               |               |                               |           |          | 9.89E-04             | <b>0.040</b> | HIL-pos   | 1.03 | 5.37E-01             | 0.269        | 0.314         |  |
| 1-stearoyl-2-oleoyl-GPE (18:0/18:1)           | Lipid         | Phosphatidylethanolamine (PE) | HMDB08993 | 1.28     |                      |              |           |      |                      |              |               |  |
|                                               |               |                               |           |          | 2.77E-04             | <b>0.019</b> | C8-pos    | 1.04 | 4.49E-01             | 0.225        | 0.314         |  |

298 \* Metabolite with \* indicates they were identified based on accurate mass data, retention time and mass spectrometry but not reference

299 standards. Therefore, the verification is not as robust as metabolites without \*.

300 † All results were adjusted for age, gender, BMI, study center, and Hispanic/Latino background in HCHS/SOL, and adjusted for age, sex, BMI,

301 study site (site WFU and UCLA are combined due to low cell count), and race in MESA. Unadj-p is the abbreviations of raw p before the FDR

302 correction. 1-sided p-values reflect the required of the same direction of associations in the discovery and validation datasets for concluding

303 replication.

304

**Figure 2. Heatmap showing estimated odds ratios of metabolites with significant FDR-adjusted p-value for OSA in HCHS/SOL and in MESA**

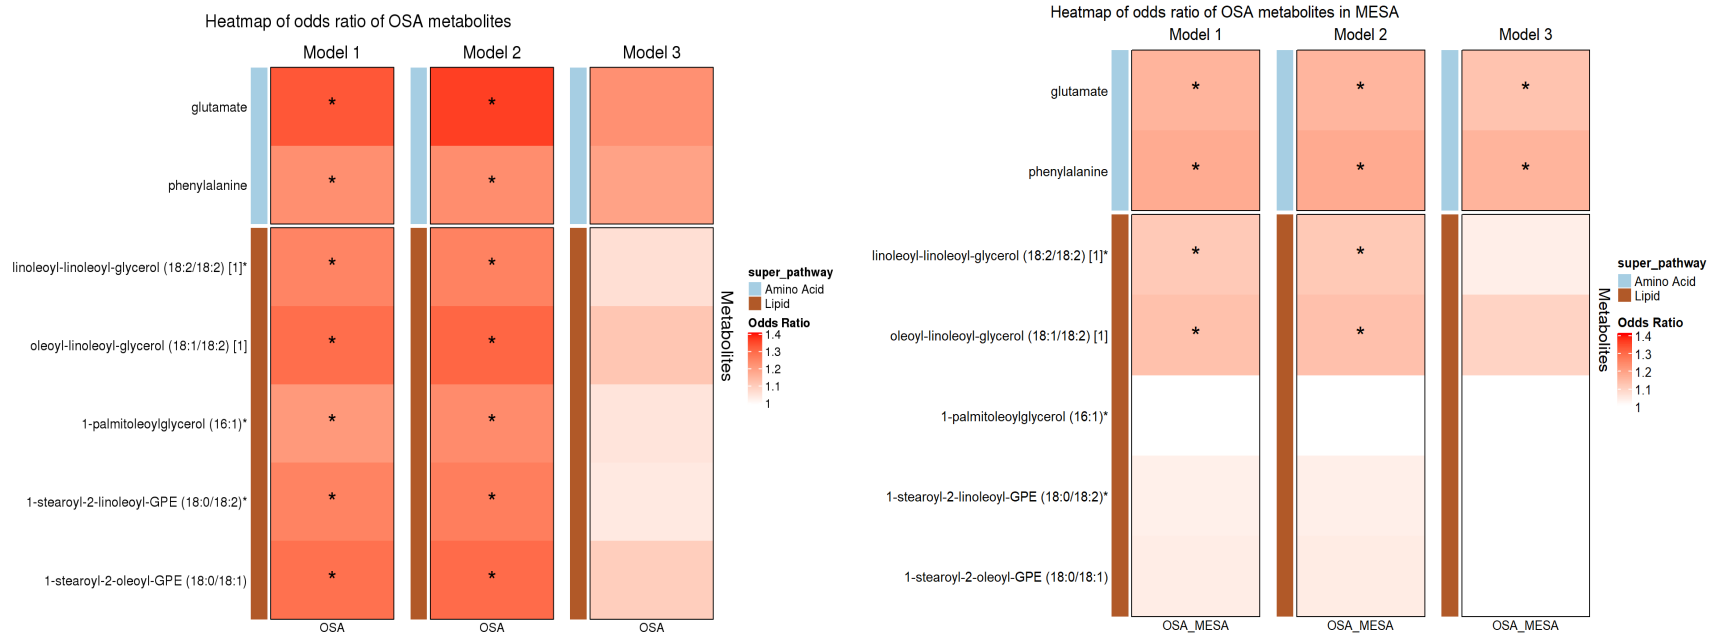

\* indicates FDR  $p < 0.05$ . In HCHS/SOL: Model 1 adjusted for age, gender, center, background, and bmi. Model 2 adjusted for age, gender, center, background, bmi, alcohol use, smoking status, physical activity and diet (AHEI 2010). Model 3 adjusted for age, gender, center, background, bmi, alcohol use, smoking status, physical activity, diet, T2DM, hypertension, fasting glucose, fasting insulin, HOMA\_IR, HDL, LDL, total cholesterol, triglycerides, systolic blood pressure and diastolic blood pressure. In MESA: Model 1 adjusted for age, gender, BMI, study site (site WFU and UCLA are combined due to low cell count), and race. Model 2 adjusted for age, gender, BMI, study site, race, alcohol use and smoking status. Model 3 adjusted for age, gender, BMI, study site, race, alcohol use, smoking status, hypertension indicator, fasting glucose, HDL, LDL, cholesterol, triglycerides, systolic blood pressure and diastolic blood pressure.

306

307 LASSO regression for joint selection and estimation of metabolite  
308 associations with OSA and AHI in HCHS/SOL

309 We used a LASSO regression to select a set of metabolites that jointly associated with sleep  
310 apnea traits in the HCHS/SOL. Among the 14 metabolites identified for OSA by LASSO (**Figure 3**),  
311 there were one carbohydrate, one peptide, three amino acids, three lipids, three nucleotides,  
312 and three cofactors and vitamins, among which biliverdin and serine were unique to the OSA  
313 metabolite index while the rest were shared between the OSA and AHI metabolite indices. 41  
314 metabolites were identified for AHI (**Supplemental Figure 3**), among which 29 metabolites were  
315 unique to AHI metabolite index. Metabolites identified by sex-specific LASSO are provided in  
316 the supplemental materials (**Supplemental Figures 4-7**).

317

318

**Figure 3: Coefficients for metabolites selected by LASSO (OSA model) in HCHS/SOL.**

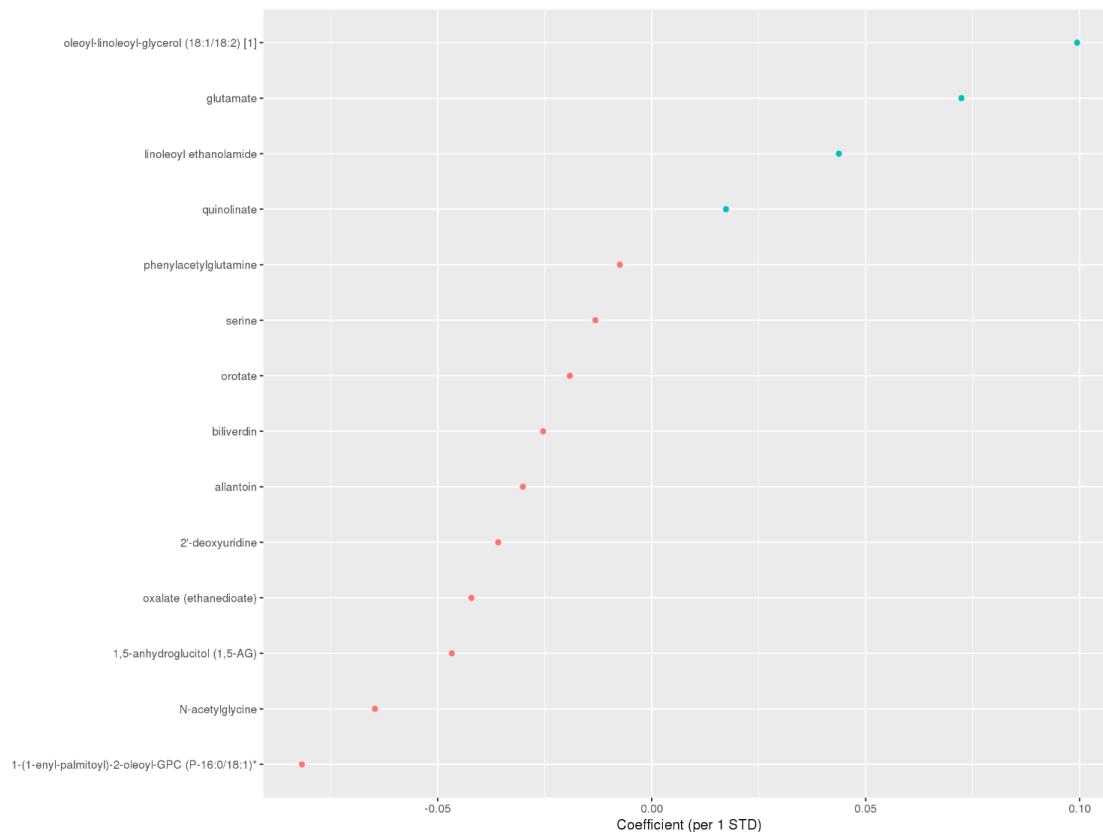

Blue: coefficient<0; Red: coefficient>0. Definition of abbreviations: OSA = moderate to severe obstructive sleep apnea (AHI $\geq$ 15), LASSO = least absolute shrinkage and selection operator.

319

### 320 Metabolite indices associations with OSA and AHI in HCHS/SOL and in 321 independent validation in MESA

322 We constructed OSA and AHI metabolite indices in both HCHS/SOL and MESA based on the  
323 weights from the LASSO regressions conducted in HCHS/SOL. **Table 3** provides overall and sex-  
324 stratified results. As expected by construction, the metabolite indices were associated with  
325 their phenotypes in HCHS/SOL (OSA metabolite index OR: 1.50; 95% CI 1.30-1.74;  $P < 0.001$ ; AHI

326 metabolite index beta =2.12 per 1 SD of the index, 95% CI 1.43-2.81;  $P < 0.001$ ) after  
327 adjustment for demographic covariates (i.e., age, sex, BMI, study center, and Hispanic/Latino  
328 background); the associations persisted after additional adjustment of lifestyle (i.e., alcohol  
329 usage, smoking status, physical activity and diet) and comorbidity (i.e., diabetes, hypertension,  
330 fasting glucose, fasting insulin, HOMA-IR, HDL, LDL, total cholesterol, triglycerides, systolic  
331 blood pressure, diastolic blood pressure) covariates (OSA metabolite index OR: 1.50; 95% CI  
332 1.21-1.85;  $P < 0.001$ ; AHI metabolite index beta =1.73 per 1 SD of the index, 95% CI 0.96-2.50;  
333  $P < 0.001$ ). In the validation dataset, the OSA metabolite index was also associated with an  
334 increased odds ratio for OSA (OR: 1.41; 95% CI 1.13-1.77;  $P = 0.003$ ) (**Table 3**) when adjusted for  
335 demographic (i.e., age, sex, BMI, study site, and race) covariates and remained similar when  
336 adjusted for lifestyle (i.e., alcohol usage and smoking status) and comorbidity (i.e.,  
337 hypertension, fasting glucose, HDL, LDL, cholesterol, triglycerides, systolic blood pressure and  
338 diastolic blood pressure) covariates (OR: 1.55; 95% CI 1.10-2.20;  $P = 0.013$ ). When compared  
339 with the lowest quartile of the OSA metabolite index, the top quartile showed more than two-  
340 fold increase in risk for OSA [OR: 2.53; 95% CI (1.37-4.70);  $P = 0.003$ ] in the primary model and  
341 remained significant when adjusted for lifestyle and comorbidity covariates [OR: 2.63; 95% CI  
342 (1.14-6.14);  $P = 0.024$ ] (see **Figure 3 and Supplemental Figure 3**). AHI metabolite index  
343 associations had higher p-values in MESA, compared to OSA metabolite index associations  
344 (**Table 3**). AHI metabolite index was only replicated in women, adjusted for demographic,  
345 lifestyle, and comorbidity covariates in MESA. Notably, both OSA metabolite index and AHI  
346 metabolite index associations with their phenotypes were stronger when evaluated in women  
347 compared to the overall sample, in both HCHS/SOL and MESA.

**Table 3. Estimated associations between OSA and AHI metabolite indices and their respective phenotypes, in HCHS/SOL and MESA**

| OSA                           | HCHS/SOL         |                  |                  |                  |                  |                  | MESA             |              |                  |          |                  |              |
|-------------------------------|------------------|------------------|------------------|------------------|------------------|------------------|------------------|--------------|------------------|----------|------------------|--------------|
|                               | Both             |                  | Male             |                  | Female           |                  | Both             |              | Male             |          | Female           |              |
| <i>Predictors</i>             | <i>OR*</i>       | <i>p</i>         | <i>OR</i>        | <i>p</i>         | <i>OR</i>        | <i>p</i>         | <i>OR</i>        | <i>p</i>     | <i>OR</i>        | <i>p</i> | <i>OR</i>        | <i>p</i>     |
| <b>Model 1†</b>               |                  |                  |                  |                  |                  |                  |                  |              |                  |          |                  |              |
| OSA-Met Index                 | 1.50             | <b>&lt;0.001</b> | 1.41             | <b>&lt;0.001</b> | 1.78             | <b>&lt;0.001</b> | 1.41             | <b>0.003</b> | 1.17             | 0.403    | 1.48             | <b>0.009</b> |
|                               | [1.30–1.74]      |                  | [1.17–1.70]      |                  | [1.47–2.14]      |                  | [1.13–1.77]      |              | [0.81–1.72]      |          | [1.11–2.00]      |              |
| Male-specific OSA-Met Index   |                  |                  | 1.67             | <b>&lt;0.001</b> |                  |                  |                  |              | 1.20             | 0.369    |                  |              |
|                               |                  |                  | [1.39–2.00]      |                  |                  |                  |                  |              | [0.81–1.79]      |          |                  |              |
| Female-specific OSA-Met Index |                  |                  |                  |                  | 2.12             | <b>&lt;0.001</b> |                  |              |                  |          | 1.34             | 0.082        |
|                               |                  |                  |                  |                  | [1.70–2.66]      |                  |                  |              |                  |          | [0.97–1.86]      |              |
| <b>Model 2‡</b>               |                  |                  |                  |                  |                  |                  |                  |              |                  |          |                  |              |
| OSA-Met Index                 | 1.53             | <b>&lt;0.001</b> | 1.44             | <b>&lt;0.001</b> | 1.86             | <b>&lt;0.001</b> | 1.39             | <b>0.004</b> | 1.15             | 0.476    | 1.46             | <b>0.013</b> |
|                               | [1.33–1.77]      |                  | [1.20–1.72]      |                  | [1.52–2.27]      |                  | [1.11–1.76]      |              | [0.78–1.69]      |          | [1.09–1.98]      |              |
| Male-specific OSA-Met Index   |                  |                  | 1.71             | <b>&lt;0.001</b> |                  |                  |                  |              | 1.17             | 0.433    |                  |              |
|                               |                  |                  | [1.43–2.05]      |                  |                  |                  |                  |              | [0.79–1.75]      |          |                  |              |
| Female-specific OSA-Met Index |                  |                  |                  |                  | 2.19             | <b>&lt;0.001</b> |                  |              |                  |          | 1.39             | 0.053        |
|                               |                  |                  |                  |                  | [1.71–2.79]      |                  |                  |              |                  |          | [1.00–1.94]      |              |
| <b>Model 3§</b>               |                  |                  |                  |                  |                  |                  |                  |              |                  |          |                  |              |
| OSA-Met Index                 | 1.50             | <b>&lt;0.001</b> | 1.43             | <b>0.009</b>     | 1.89             | <b>&lt;0.001</b> | 1.55             | <b>0.013</b> | 1.30             | 0.365    | 1.71             | <b>0.026</b> |
|                               | [1.21–1.85]      |                  | [1.09–1.88]      |                  | [1.35–2.64]      |                  | [1.10–2.20]      |              | [0.74–2.30]      |          | [1.07–2.78]      |              |
| Male-specific OSA-Met Index   |                  |                  | 1.71             | <b>&lt;0.001</b> |                  |                  |                  |              | 1.13             | 0.600    |                  |              |
|                               |                  |                  | [1.39–2.09]      |                  |                  |                  |                  |              | [0.71–1.82]      |          |                  |              |
| Female-specific OSA-Met Index |                  |                  |                  |                  | 2.17             | <b>&lt;0.001</b> |                  |              |                  |          | 1.41             | 0.094        |
|                               |                  |                  |                  |                  | [1.54–3.04]      |                  |                  |              |                  |          | [0.95–2.11]      |              |
| AHI                           | HCHS/SOL         |                  |                  |                  |                  |                  | MESA             |              |                  |          |                  |              |
| <i>Predictors</i>             | Both             |                  | Male             |                  | Female           |                  | Both             |              | Male             |          | Female           |              |
|                               | <i>Estimates</i> | <i>p</i>         | <i>Estimates</i> | <i>p</i>         | <i>Estimates</i> | <i>p</i>         | <i>Estimates</i> | <i>p</i>     | <i>Estimates</i> | <i>p</i> | <i>Estimates</i> | <i>p</i>     |
| <b>Model 1†</b>               |                  |                  |                  |                  |                  |                  |                  |              |                  |          |                  |              |
| AHI-Met Index                 | 2.12             | <b>&lt;0.001</b> | 2.39             | <b>&lt;0.001</b> | 1.47             | <b>&lt;0.001</b> | 1.45             | 0.083        | -1.59            | 0.254    | 3.38             | <b>0.001</b> |
|                               | [1.43–2.81]      |                  | [1.21–3.58]      |                  | [1.00–1.94]      |                  | [-0.19–3.08]     |              | [-4.33–1.15]     |          | [1.42–5.33]      |              |
| Male-specific AHI-Met Index   |                  |                  | 3.54             | <b>&lt;0.001</b> |                  |                  |                  |              | -1.99            | 0.628    |                  |              |
|                               |                  |                  | [2.04–5.03]      |                  |                  |                  |                  |              | [-10.11–6.12]    |          |                  |              |



|                                  |                     |                  |                     |                  |                     |                  |                      |       |                        |       |                      |              |
|----------------------------------|---------------------|------------------|---------------------|------------------|---------------------|------------------|----------------------|-------|------------------------|-------|----------------------|--------------|
| Female-specific<br>AHI-Met Index |                     |                  |                     |                  | 1.70<br>[0.98–2.43] | <b>&lt;0.001</b> |                      |       |                        |       | 2.75<br>[0.57–4.93]  | <b>0.013</b> |
| <b>Model 2†</b>                  |                     |                  |                     |                  |                     |                  |                      |       |                        |       |                      |              |
| AHI-Met Index                    | 2.12<br>[1.41–2.83] | <b>&lt;0.001</b> | 2.41<br>[1.22–3.61] | <b>&lt;0.001</b> | 1.49<br>[1.01–1.96] | <b>&lt;0.001</b> | 1.42<br>[-0.22–3.06] | 0.089 | -1.55<br>[-4.32–1.21]  | 0.269 | 3.25<br>[1.30–5.21]  | <b>0.001</b> |
| Male-specific<br>AHI-Met Index   |                     |                  | 3.62<br>[2.10–5.14] | <b>&lt;0.001</b> |                     |                  |                      |       | -2.10<br>[-10.25–6.05] | 0.612 |                      |              |
| Female-specific<br>AHI-Met Index |                     |                  |                     |                  | 1.69<br>[0.97–2.42] | <b>&lt;0.001</b> |                      |       |                        |       | 2.80<br>[0.63–4.98]  | <b>0.012</b> |
| <b>Model 3§</b>                  |                     |                  |                     |                  |                     |                  |                      |       |                        |       |                      |              |
| AHI-Met Index                    | 1.73<br>[0.96–2.50] | <b>&lt;0.001</b> | 2.14<br>[0.79–3.48] | <b>0.002</b>     | 1.11<br>[0.64–1.58] | <b>&lt;0.001</b> | 1.20<br>[-0.56–2.96] | 0.181 | -0.96<br>[-3.96–2.03]  | 0.527 | 2.65<br>[0.54–4.76]  | <b>0.014</b> |
| Male-specific<br>AHI-Met Index   |                     |                  | 3.34<br>[1.65–5.02] | <b>&lt;0.001</b> |                     |                  |                      |       | -2.45<br>[-11.21–6.31] | 0.581 |                      |              |
| Female-specific<br>AHI-Met Index |                     |                  |                     |                  | 1.05<br>[0.43–1.67] | <b>0.001</b>     |                      |       |                        |       | 2.09<br>[-0.34–4.52] | 0.092        |

\* per 1 STD increase in metabolite index (Met Index).

† Model 1 adjusted for age, gender, BMI, study center, and Hispanic/Latino background in HCHS/SOL, and adjusted for age, gender, BMI, study site (site WFU and UCLA are combined due to low cell count), and race in MESA.

‡ Model 2 adjusted for all covariates in model 1, in HCHS/SOL model 2 additionally adjusted for alcohol usage, smoking status, physical activity and diet; in MESA, model 2 additionally adjusted for alcohol usage and smoking status.

§ Model 3 adjusted for all covariates in model 2, in HCHS/SOL, model 3 additionally adjusted for diabetes, hypertension, fasting glucose, fasting insulin, HOMA-IR, HDL, LDL, total cholesterol, triglycerides, systolic blood pressure, diastolic blood pressure; in MESA, model 3 additionally adjusted for hypertension indicator, fasting glucose, HDL, LDL, cholesterol, triglycerides, systolic blood pressure and diastolic blood pressure.

1

2 Results from secondary analysis of a sex specific metabolite indices are also provided in **Table 3**.

3 Only the female-specific AHI metabolite index replicated in MESA in model 1 and 2, but its

4 association with AHI in women was weaker than that of the AHI metabolite index trained on

5 the full HCHS/SOL sample, both in terms of p-value and of estimated effect size.

6

## 7 Discussion

8 In this paper, we leveraged metabolomics data from two large, diverse community-based

9 cohorts to derive the first metabolite index for moderate to severe OSA, as well as to identify

10 individual metabolites associated with this disorder. We studied 219 metabolites and their

11 associations with OSA and AHI in the HCHS/SOL using two methods: (1) analysis of individual

12 metabolites, and (2) LASSO to identify a subset of metabolites that jointly predict OSA or AHI.

13 Then, we studied the associations in an independent validation study, MESA. We used the

14 results from LASSO to derive an OSA and AHI metabolite indices. In MESA, the OSA metabolite

15 index was significantly associated with moderate to severe OSA; e.g., individuals in the highest

16 quartile for OSA metabolite index had a more than 2-fold increased odds of moderate to severe

17 OSA- both in the derivation sample and in an independent sample that varied by ancestry, age,

18 and OSA prevalence, with findings that persisted after adjusting for multiple lifestyle and health

19 covariates. In contrast, when modeling AHI as a continuous measure of sleep apnea, weaker

20 associations were observed, except for the top quartiles among females. In the association

21 analysis of individual metabolites, seven metabolites were associated with OSA in HCHS/SOL  
22 (FDR  $p < 0.05$ ), of which four associations replicated in MESA.

23

24 We implemented two approaches to study the metabolomic correlates of sleep apnea  
25 phenotypes: LASSO and individual-metabolite regression analysis. These approaches serve  
26 different purposes: single metabolite regression highlights individual metabolites associated  
27 with sleep apnea phenotypes without adjustment to other metabolites, while LASSO estimates  
28 the combined effect of multiple metabolites. A metabolite identified as associated with sleep  
29 apnea phenotypes individually may not be selected by the LASSO analysis (e.g., if a different  
30 metabolite correlated to it was selected by LASSO). Thus, it is not surprising that two of the  
31 replicated metabolites identified in single metabolite analysis were not selected by LASSO.  
32 Similarly, a specific metabolite may be selected by LASSO, but not by individual metabolite  
33 analysis due to adjustment for multiple testing, which is not done in LASSO analysis. The OSA  
34 metabolite index, constructed based on the LASSO results, is a single index using multiple blood  
35 biomarkers which together reflect the biochemical differences in the blood of individuals with  
36 and without OSA. The OSA metabolite index also showed stronger association with OSA than  
37 any single metabolite, in both the discovery and validation study, consistent with the influence  
38 of multiple metabolites in OSA pathophysiology (see **Table 3, S3 Table**). While future work is  
39 needed to study whether the metabolite index can be used in the clinic for OSA screening or  
40 clinical management of OSA patients, it is clearly useful from a statistical and epidemiological  
41 standpoints, as analysis based on the metabolite index had evidently higher statistical power  
42 than analyses testing single metabolite associations. Therefore, it may also enable additional

43 studies of the pathophysiology of OSA and its relationship with other cardiometabolic  
44 conditions.

45

46 Four metabolites were replicated in the single metabolite regression: glutamate, oleoyl-  
47 linoleoyl-glycerol (18:1/18:2) (DAG(36:3)), linoleoyl-linoleoyl-glycerol (18:2/18:2) (DAG(36:4))  
48 and phenylalanine, among which glutamate and phenylalanine remained positively associated  
49 with OSA after adjusting for lifestyle and comorbidities in addition to basic demographics. Both  
50 metabolites have some previous evidence linking them to OSA or other sleep disorders, as well  
51 as cardiometabolic diseases, and suggest that elevations in glutamate and phenylalanine can be  
52 investigated as biomarkers for adverse outcomes in patients with OSA. High plasma glutamate  
53 has been associated with total and visceral adiposity, dyslipidemia and insulin resistance (27),  
54 as well as increased risks for incident cardiovascular disease (28), type 2 diabetes (29), and  
55 subclinical atherosclerosis (30), independent of established cardiovascular risk factors. The  
56 positive association between glutamate and OSA observed in our study may suggest a shared  
57 metabolomic profile for OSA and other cardiometabolic phenotypes. Previous studies in rats  
58 animals and human showed that more frequent sleep apneas led to increased level of  
59 glutamate in brain (31–33). Glutamate is the major excitatory neurotransmitter in the brain,  
60 and modulates brain energy metabolism and neuronal synaptic plasticity. Although the blood-  
61 brain barrier prevents plasma glutamate to freely permeate into the central nervous system  
62 (34), when glutamate increases in the brain, the brain-to-blood glutamate efflux also increases,  
63 as suggested by the correlation between the peripheral glutamate and the central nerve system

64 glutamate levels (35). These findings support further research addressing the roles of peripheral  
65 and central glutamate in the pathophysiology of OSA.

66

67 Phenylalanine is an essential aromatic amino acid that plays a key role in the biosynthesis of  
68 other amino acids, including the neurotransmitters, dopamine, and norepinephrine. Studies  
69 have shown that plasma phenylalanine level can be elevated due to inflammation (36,37), and  
70 inflammation is a common finding in OSA (38). One mechanism for the increased levels of  
71 phenylalanine may be through chronic hypoxia, which has been reported to increase both  
72 systemic and cerebral delivery of phenylalanine (39). This is in line with our evidence:  
73 peripheral phenylalanine was elevated among individuals with moderate to severe OSA  
74 patients (**S3 Table**). A prior lab-based study that measured a few metabolites over the course of  
75 sleep reported that phenylalanine levels decreased less overnight among patients with OSA  
76 compared to controls (40). Phenylalanine levels were also reported to be elevated after sleep  
77 restriction (41). The downstream effects of phenylalanine have been studied more widely in  
78 other chronic conditions, with reports of associations with elevated pro-inflammatory  
79 cytokines, suppressed immunity and increased mortality among heart failure patients (42);  
80 more rapid telomere shortening consistent with accelerated aging (43). Recent studies reported  
81 elevations of phenylalanine associated with adverse COPD outcomes (44), which was  
82 postulated to reflect muscle breakdown and respiratory muscle insufficiency (45). Elevated  
83 plasma phenylalanine was shown to be a strong predictor for cardiovascular risk (46) and a  
84 biomarker, mediator and potentially therapeutic target for pulmonary hypertension (47).  
85 Further research on the association of OSA and phenylalanine may further identify the roles of

86 hypoxia, inflammation, and muscle function in the pathophysiology of OSA and cardiometabolic  
87 conditions.

88

89 Our study has also shown that increased plasma levels of two diacylglycerols (DAGs): DAG(36:3)  
90 and DAG(36:4) were associated with moderate to severe OSA. Altered lipids metabolism is  
91 often observed among OSA patients (48–50); specifically, intermittent hypoxemia can  
92 stimulate lipolysis, increasing free fatty acid levels (51). Abnormalities in lipid metabolism may  
93 result in liver and skeletal muscle fat deposition, exacerbating OSA through inflammatory or  
94 muscle-related pathways (52). Therefore, the associations with these diacylglycerols may  
95 reflect mechanisms by which OSA related hypoxemia alters fatty acid metabolism. These  
96 associations, however, did not replicate in the validation study once adjusted for comorbidities,  
97 suggesting that the associations might be confounded by cardiometabolic conditions that often  
98 accompany OSA.

99

100 Estimated OSA associations, in both LASSO and single metabolite analysis, were generally  
101 stronger than AHI associations. Potential reasons are the variability of AHI and the potential  
102 non-linear metabolomic associations with AHI. Notably, non-linearity (i.e., a threshold effect)  
103 was previously shown for AHI association with hypoxemia and sympathetic nervous system  
104 activation burden (53).

105

106 Sex differences have been increasingly reported among OSA patients (17). Population-based  
107 studies have shown that the overall OSA prevalence is higher among men than women (54),  
108 while metabolic syndrome and cardiovascular conditions are more strongly associated with OSA  
109 among female patients compared to males (55,56). Indeed, when assessing the metabolite  
110 indices developed in both sexes and tested for their associations with OSA and AHI, we  
111 observed stronger associations among women than men in the MESA validation dataset (**Table**  
112 **3**). However, compared to the metabolite indices developed in combined sex strata, sex-specific  
113 metabolite indices had weaker associations with the OSA/AHI in the validation data set (weaker  
114 effect size estimates and higher p-value), which may be the result of more misclassification  
115 when using a smaller dataset for discovery.

116 In addition to pointing to novel individual metabolites that play a role in OSA, our metabolite  
117 indices also showed moderately strong associations with OSA in an external sample, despite the  
118 marked differences in race/ethnicity, age, and OSA prevalence compared to the discovery  
119 sample. This supports the overall generalizability of the metabolite index across diverse  
120 populations. Nonetheless, the utility of a 2-fold increased risk of OSA among individuals in the  
121 highest metabolite index quartile in helping to screen or triage patients for more  
122 comprehensive testing will need to be formally evaluated, potentially combining metabolite  
123 data with other information, such as OSA-related symptoms, to improve screening.

124

125 A strength of our study is that our population-based sample is more than 10-fold larger than  
126 prior studies (57), includes a high proportion of ethnic/racial minorities who have been under-

127 represented in research but are at increased for adverse health outcomes, and is more  
128 representative of samples in the general population who remain include large numbers of  
129 undiagnosed individuals. We used rigorous statistical methods, adjusted for a large number of  
130 lifestyle and health covariates, and were able to replicate the main findings despite large  
131 differences in our discovery and validation populations, which suggests relatively strong  
132 associations and generalizability of the metabolite associations with OSA.

133

134 There are several limitations in this study. The temporal relationship between the blood sample  
135 collection and sleep test was concurrent in HCHS/SOL and up to one year apart in MESA,  
136 allowing for cross-sectional associations, but limiting our ability to discern causal pathways.  
137 Although over 1000 metabolites were quantified in both populations, less than 300 metabolites  
138 were matched between the two platforms (after quality control only 219 distinct metabolites  
139 were mapped). We limited our study to only the matched metabolites to allow for replication  
140 testing, which strengthens the results and conclusions. MESA metabolomic profiling was  
141 conducted using three complementary platforms measuring several broad classes of small  
142 molecules therefore multiple chemical compounds from MESA were mapped to the same  
143 metabolite in the HCHS/SOL. We chose a single feature to map to any HCHS/SOL metabolite  
144 based on a set of rules related presence of redundant ions, data missingness and skewness. In  
145 the future, other more optimal approaches may be proposed and studied. Some associations  
146 failed to replicate in MESA, potentially due to heterogeneity in different populations and low  
147 power in MESA, which had a small sample size. Finally, the definitions of AHI differed slightly in  
148 the two studies: while the 3% oxyhemoglobin desaturation criterion applied to hypopneas only



149 in MESA, due to differences in the recording montage, a 3% desaturation criterion was applied  
150 for all respiratory events in HCHS/SOL.

151

152 In summary, we used two large datasets of population-based multi-ethnic cohort studies to  
153 study metabolomics associations with OSA. We developed an metabolite index that replicated  
154 across datasets, and had statistically significant association with OSA even after adjustment to  
155 cardiometabolic comorbidities. In future work we will study the possibility of developing an  
156 OSA screening tool based on this metabolite index. Four metabolites also replicated in an  
157 independent data set, of which one was previously implicated in OSA, and two were previously  
158 connected to sleep disorders. Collectively, our findings support the utility of metabolomic  
159 profiling to generate metabolite indices of sleep apnea in racially diverse populations, and to  
160 OSA's pathophysiology.

161

## 162 Acknowledgement

163 The authors thank the staff and participants of HCHS/SOL and MESA for their important  
164 contributions. We gratefully acknowledge the studies and participants who provided biological  
165 samples and data for TOPMed.

166

## 167 Data availability statement

168 MESA and HCHS/SOL data are available through application to dbGaP according to the study  
169 specific accessions. MESA phenotypes are available in: phs000209, and HCHS/SOL  
170 phenotypes: phs000810. HCHS/SOL metabolomics data are available via data use agreement  
171 with the HCHS/SOL Data Coordinating Center at the University of North Carolina at Chapel Hill,  
172 see collaborators website: <https://sites.csc.unc.edu/hchs/>.

173

## 174 Funding

175 The research was partially supported by NIH NHLBI R35 HL135818. Support for metabolomics  
176 data was graciously provided by the JLH Foundation (Houston, Texas). The Hispanic  
177 Community Health Study/Study of Latinos was carried out as a collaborative study supported by  
178 contracts from the National Heart, Lung, and Blood Institute (NHLBI) to the University of North  
179 Carolina (N01-HC65233), University of Miami (N01-HC65234), Albert Einstein College of  
180 Medicine (N01-HC65235), Northwestern University (N01-HC65236), and San Diego State  
181 University (N01-HC65237). The following Institutes/Centers/Offices contribute to the HCHS/SOL  
182 through a transfer of funds to the NHLBI: National Center on Minority Health and Health  
183 Disparities, the National Institute of Deafness and Other Communications Disorders, the  
184 National Institute of Dental and Craniofacial Research, the National Institute of Diabetes and

185 Digestive and Kidney Diseases, the National Institute of Neurological Disorders and Stroke, and  
186 the Office of Dietary Supplements. The authors thank the staff and participants of HCHS/SOL  
187 for their important contributions. MESA and the MESA SHARe project are conducted and  
188 supported by the National Heart, Lung, and Blood Institute (NHLBI) in collaboration with MESA  
189 investigators. Support for MESA is provided by contracts HHSN268201500003I, N01-HC-  
190 95159, N01-HC-95160, N01-HC-95161, N01-HC-95162, N01-HC-95163, N01-HC-95164, N01-  
191 HC-95165, N01-HC-95166, N01-HC-95167, N01-HC-95168, N01-HC-95169, UL1-TR-000040,  
192 UL1-TR-001079, UL1-TR-001420. MESA Family is conducted and supported by the National  
193 Heart, Lung, and Blood Institute (NHLBI) in collaboration with MESA investigators. Support is  
194 provided by grants and contracts R01HL071051, R01HL071205, R01HL071250, R01HL071251,  
195 R01HL071258, R01HL071259 and by the National Center for Research Resources, Grant  
196 UL1RR033176. The MESA Sleep Ancillary study was funded by NIH-NHLBI R01HL098433.  
197 The provision of genotyping data was supported in part by the National Center for Advancing  
198 Translational Sciences, CTSI grant UL1TR001881, and the National Institute of Diabetes and  
199 Digestive and Kidney Disease Diabetes Research Center (DRC) grant DK063491 to the  
200 Southern California Diabetes Endocrinology Research Center. Molecular data for the Trans-  
201 Omics in Precision Medicine (TOPMed) program was supported by the National Heart, Lung  
202 and Blood Institute (NHLBI). ). Metabolomics for “NHLBI TOPMed: Multi-Ethnic Study of  
203 Atherosclerosis (MESA)” (phs001416) was performed at Broad Institute and Beth Israel  
204 Metabolomics Platform (HHSN268201600038I). Core support including centralized genomic  
205 read mapping and genotype calling, along with variant quality metrics and filtering were  
206 provided by the TOPMed Informatics Research Center (3R01HL-117626-02S1; contract  
207 HHSN268201800002I). Core support including phenotype harmonization, data management,  
208 sample-identity QC, and general program coordination were provided by the TOPMed Data  
209 Coordinating Center (R01HL-120393; U01HL-120393; contract HHSN268201800001I).

## 210 Reference

- 211 1. Somers VK, White DP, Amin R, Abraham WT, Costa F, Culebras A, et al. Sleep apnea and  
212 cardiovascular disease: an American Heart Association/American College Of Cardiology Foundation  
213 Scientific Statement from the American Heart Association Council for High Blood Pressure Research  
214 Professional Education Committee, Council on Clinical Cardiology, Stroke Council, and Council On  
215 Cardiovascular Nursing. In collaboration with the National Heart, Lung, and Blood Institute National  
216 Center on Sleep Disorders Research (National Institutes of Health). *Circulation*. 2008 Sep  
217 2;118(10):1080–1111.
- 218 2. Peppard PE, Young T, Barnet JH, Palta M, Hagen EW, Hla KM. Increased prevalence of sleep-  
219 disordered breathing in adults. *Am J Epidemiol*. 2013 May 1;177(9):1006–1014.
- 220 3. Kapur V, Strohl KP, Redline S, Iber C, O'Connor G, Nieto J. Underdiagnosis of sleep apnea  
221 syndrome in U.S. communities. *Sleep Breath*. 2002 Jun;6(2):49–54.
- 222 4. Lastra AC, Attarian HP. The persistent gender bias in the diagnosis of obstructive sleep apnea.  
223 *Gender and the Genome*. 2018 Apr;2(2):43–48.
- 224 5. Redline S, Sotres-Alvarez D, Loredó J, Hall M, Patel SR, Ramos A, et al. Sleep-disordered  
225 breathing in Hispanic/Latino individuals of diverse backgrounds. The Hispanic Community Health  
226 Study/Study of Latinos. *Am J Respir Crit Care Med*. 2014 Feb 1;189(3):335–344.
- 227 6. Chen X, Wang R, Zee P, Lutsey PL, Javaheri S, Alcántara C, et al. Racial/Ethnic Differences in  
228 Sleep Disturbances: The Multi-Ethnic Study of Atherosclerosis (MESA). *Sleep*. 2015 Jun 1;38(6):877–888.
- 229 7. Redline S. Genetics of obstructive sleep apnea. *Principles and practice of sleep medicine*.  
230 Elsevier; 2011. p. 1183–1193.
- 231 8. Peppard PE, Young T, Palta M, Skatrud J. Prospective study of the association between sleep-  
232 disordered breathing and hypertension. *N Engl J Med*. 2000 May 11;342(19):1378–1384.
- 233 9. Kasai T, Floras JS, Bradley TD. Sleep apnea and cardiovascular disease: a bidirectional  
234 relationship. *Circulation*. 2012 Sep 18;126(12):1495–1510.
- 235 10. Vgontzas AN, Papanicolaou DA, Bixler EO, Hopper K, Lotsikas A, Lin HM, et al. Sleep apnea and  
236 daytime sleepiness and fatigue: relation to visceral obesity, insulin resistance, and hypercytokinemia. *J*  
237 *Clin Endocrinol Metab*. 2000 Mar;85(3):1151–1158.
- 238 11. Heilbrunn ES, Ssentongo P, Chinchilli VM, Oh J, Ssentongo AE. Sudden death in individuals with  
239 obstructive sleep apnoea: a systematic review and meta-analysis. *BMJ Open Respir Res*. 2021 Jun;8(1).
- 240 12. Idle JR, Gonzalez FJ. *Metabolomics*. *Cell Metab*. 2007 Nov;6(5):348–351.
- 241 13. Ussher JR, Elmariah S, Gerszten RE, Dyck JRB. The Emerging Role of Metabolomics  
242 in the Diagnosis and Prognosis of Cardiovascular Disease. *J Am Coll Cardiol*. 2016 Dec 27;68(25):2850–  
243 2870.
- 244 14. Hunter WG, Kelly JP, McGarrah RW, Khouri MG, Craig D, Haynes C, et al. Metabolomic profiling  
245 identifies novel circulating biomarkers of mitochondrial dysfunction differentially elevated in heart

- 246 failure with preserved versus reduced ejection fraction: evidence for shared metabolic impairments in  
247 clinical heart failure. *J Am Heart Assoc.* 2016 Jul 29;5(8).
- 248 15. Ferrarini A, Rupérez FJ, Erazo M, Martínez MP, Villar-Álvarez F, Peces-Barba G, et al.  
249 Fingerprinting-based metabolomic approach with LC-MS to sleep apnea and hypopnea syndrome: a pilot  
250 study. *Electrophoresis.* 2013 Oct;34(19):2873–2881.
- 251 16. Engeli S, Blüher M, Jumpertz R, Wiesner T, Wirtz H, Bosse-Henck A, et al. Circulating anandamide  
252 and blood pressure in patients with obstructive sleep apnea. *J Hypertens.* 2012 Dec;30(12):2345–2351.
- 253 17. Won CHJ, Reid M, Sofer T, Azarbarzin A, Purcell S, White D, et al. Sex differences in obstructive  
254 sleep apnea phenotypes, the multi-ethnic study of atherosclerosis. *Sleep.* 2020 May 12;43(5).
- 255 18. Lavange LM, Kalsbeek WD, Sorlie PD, Avilés-Santa LM, Kaplan RC, Barnhart J, et al. Sample  
256 design and cohort selection in the Hispanic Community Health Study/Study of Latinos. *Ann Epidemiol.*  
257 2010 Aug;20(8):642–649.
- 258 19. Westbrook PR, Levendowski DJ, Cvetinovic M, Zavora T, Velimirovic V, Henninger D, et al.  
259 Description and validation of the apnea risk evaluation system: a novel method to diagnose sleep apnea-  
260 hypopnea in the home. *Chest.* 2005 Oct;128(4):2166–2175.
- 261 20. Evans AM, DeHaven CD, Barrett T, Mitchell M, Milgram E. Integrated, nontargeted ultrahigh  
262 performance liquid chromatography/electrospray ionization tandem mass spectrometry platform for  
263 the identification and relative quantification of the small-molecule complement of biological systems.  
264 *Anal Chem.* 2009 Aug 15;81(16):6656–6667.
- 265 21. Bild DE, Bluemke DA, Burke GL, Detrano R, Diez Roux AV, Folsom AR, et al. Multi-Ethnic Study of  
266 Atherosclerosis: objectives and design. *Am J Epidemiol.* 2002 Nov 1;156(9):871–881.
- 267 22. Paynter NP, Balasubramanian R, Giulianini F, Wang DD, Tinker LF, Gopal S, et al. Metabolic  
268 predictors of incident coronary heart disease in women. *Circulation.* 2018 Feb 20;137(8):841–853.
- 269 23. Lumley T. survey: analysis of complex survey samples [Internet]. 2020 [cited 2021 Nov 18].  
270 Available from: <https://cran.r-project.org/web/packages/survey/index.html>
- 271 24. Benjamini Y. Discovering the false discovery rate. *J Royal Statistical Soc B.* 2010 Aug 5;72(4):405–  
272 416.
- 273 25. Sofer T, Heller R, Bogomolov M, Avery CL, Graff M, North KE, et al. A powerful statistical  
274 framework for generalization testing in GWAS, with application to the HCHS/SOL. *Genet Epidemiol.* 2017  
275 Apr;41(3):251–258.
- 276 26. Friedman J, Hastie T, Tibshirani R, Narasimhan B, Tay K, Simon N. Package glmnet. *J Stat Softw.*  
277 2010 Feb 21;33(1).
- 278 27. Cheng S, Rhee EP, Larson MG, Lewis GD, McCabe EL, Shen D, et al. Metabolite profiling identifies  
279 pathways associated with metabolic risk in humans. *Circulation.* 2012 May 8;125(18):2222–2231.
- 280 28. Zheng Y, Hu FB, Ruiz-Canela M, Clish CB, Dennis C, Salas-Salvado J, et al. Metabolites of  
281 glutamate metabolism are associated with incident cardiovascular events in the PREDIMED prevención  
282 con dieta mediterránea (PREDIMED) trial. *J Am Heart Assoc.* 2016 Sep 15;5(9).

- 283 29. Liu X, Zheng Y, Guasch-Ferré M, Ruiz-Canela M, Toledo E, Clish C, et al. High plasma glutamate  
284 and low glutamine-to-glutamate ratio are associated with type 2 diabetes: Case-cohort study within the  
285 PREDIMED trial. *Nutr Metab Cardiovasc Dis*. 2019 Oct;29(10):1040–1049.
- 286 30. Lehn-Stefan A, Peter A, Machann J, Schick F, Randrianarisoa E, Heni M, et al. Elevated Circulating  
287 Glutamate Is Associated With Subclinical Atherosclerosis Independently of Established Risk Markers: A  
288 Cross-Sectional Study. *J Clin Endocrinol Metab*. 2021 Jan 23;106(2):e982–e989.
- 289 31. Fung SJ, Xi M-C, Zhang J-H, Sampogna S, Yamuy J, Morales FR, et al. Apnea promotes glutamate-  
290 induced excitotoxicity in hippocampal neurons. *Brain Res*. 2007 Nov 7;1179:42–50.
- 291 32. Macey PM, Sarma MK, Nagarajan R, Aysola R, Siegel JM, Harper RM, et al. Obstructive sleep  
292 apnea is associated with low GABA and high glutamate in the insular cortex. *J Sleep Res*. 2016  
293 Aug;25(4):390–394.
- 294 33. Macey PM, Sarma MK, Prasad JP, Ogren JA, Aysola R, Harper RM, et al. Obstructive sleep apnea  
295 is associated with altered midbrain chemical concentrations. *Neuroscience*. 2017 Nov 5;363:76–86.
- 296 34. Hawkins RA. The blood-brain barrier and glutamate. *Am J Clin Nutr*. 2009 Sep;90(3):867S–874S.
- 297 35. Alfredsson G, Wiesel FA, Tylec A. Relationships between glutamate and monoamine metabolites  
298 in cerebrospinal fluid and serum in healthy volunteers. *Biol Psychiatry*. 1988 Apr 1;23(7):689–697.
- 299 36. Murr C, Grammer TB, Meinitzer A, Kleber ME, März W, Fuchs D. Immune activation and  
300 inflammation in patients with cardiovascular disease are associated with higher phenylalanine to  
301 tyrosine ratios: the ludwigshafen risk and cardiovascular health study. *J Amino Acids*. 2014 Feb  
302 10;2014:783730.
- 303 37. Strasser B, Sperner-Unterweger B, Fuchs D, Gostner JM. Mechanisms of Inflammation-  
304 Associated Depression: Immune Influences on Tryptophan and Phenylalanine Metabolisms. *Current*  
305 *topics in behavioral neurosciences*. 2017;31:95–115.
- 306 38. Huang T, Goodman M, Li X, Sands SA, Li J, Stampfer MJ, et al. C-reactive Protein and Risk of OSA  
307 in Four US Cohorts. *Chest*. 2021 Jun;159(6):2439–2448.
- 308 39. Dahl RH, Berg RMG, Taudorf S, Bailey DM, Lundby C, Christensen M, et al. Transcerebral  
309 exchange kinetics of large neutral amino acids during acute inspiratory hypoxia in humans. *Scand J Clin*  
310 *Lab Invest*. 2019 Dec;79(8):595–600.
- 311 40. Kiens O, Taalberg E, Ivanova V, Veeväli K, Laurits T, Tamm R, et al. The effect of obstructive sleep  
312 apnea on peripheral blood amino acid and biogenic amine metabolome at multiple time points  
313 overnight. *Sci Rep*. 2021 May 24;11(1):10811.
- 314 41. Bell LN, Kilkus JM, Booth JN, Bromley LE, Imperial JG, Penev PD. Effects of sleep restriction on  
315 the human plasma metabolome. *Physiol Behav*. 2013 Oct 2;122:25–31.
- 316 42. Chen W-S, Wang C-H, Cheng C-W, Liu M-H, Chu C-M, Wu H-P, et al. Elevated plasma  
317 phenylalanine predicts mortality in critical patients with heart failure. *ESC Heart Fail*. 2020  
318 Oct;7(5):2884–2893.

- 319 43. Eriksson JG, Guzzardi M-A, Iozzo P, Kajantie E, Kautiainen H, Salonen MK. Higher serum  
320 phenylalanine concentration is associated with more rapid telomere shortening in men. *Am J Clin Nutr.*  
321 2017 Jan;105(1):144–150.
- 322 44. Ubhi BK, Riley JH, Shaw PA, Lomas DA, Tal-Singer R, MacNee W, et al. Metabolic profiling detects  
323 biomarkers of protein degradation in COPD patients. *Eur Respir J.* 2012 Aug;40(2):345–355.
- 324 45. Kuo W-K, Liu Y-C, Chu C-M, Hua C-C, Huang C-Y, Liu M-H, et al. Amino Acid-Based Metabolic  
325 Indexes Identify Patients With Chronic Obstructive Pulmonary Disease And Further Discriminates  
326 Patients In Advanced BODE Stages. *Int J Chron Obstruct Pulmon Dis.* 2019 Sep 30;14:2257–2266.
- 327 46. Würtz P, Havulinna AS, Soininen P, Tynkkynen T, Prieto-Merino D, Tillin T, et al. Metabolite  
328 profiling and cardiovascular event risk: a prospective study of 3 population-based cohorts. *Circulation.*  
329 2015 Mar 3;131(9):774–785.
- 330 47. Tan R, Li J, Liu F, Liao P, Ruiz M, Dupuis J, et al. Phenylalanine induces pulmonary hypertension  
331 through calcium-sensing receptor activation. *Am J Physiol Lung Cell Mol Physiol.* 2020 Dec  
332 1;319(6):L1010–L1020.
- 333 48. Lebkuchen A, Carvalho VM, Venturini G, Salgueiro JS, Freitas LS, Dellavance A, et al.  
334 Metabolomic and lipidomic profile in men with obstructive sleep apnoea: implications for diagnosis and  
335 biomarkers of cardiovascular risk. *Sci Rep.* 2018 Jul 26;8(1):11270.
- 336 49. Geovanini GR, Wang R, Weng J, Jenny NS, Shea S, Allison M, et al. Association between  
337 Obstructive Sleep Apnea and Cardiovascular Risk Factors: Variation by Age, Sex, and Race. *The Multi-*  
338 *Ethnic Study of Atherosclerosis. Annals of the American Thoracic Society.* 2018;15(8):970–977.
- 339 50. Nadeem R, Singh M, Nida M, Waheed I, Khan A, Ahmed S, et al. Effect of obstructive sleep apnea  
340 hypopnea syndrome on lipid profile: a meta-regression analysis. *J Clin Sleep Med.* 2014 May  
341 15;10(5):475–489.
- 342 51. Chopra S, Rathore A, Younas H, Pham LV, Gu C, Beselman A, et al. Obstructive sleep apnea  
343 dynamically increases nocturnal plasma free fatty acids, glucose, and cortisol during sleep. *J Clin*  
344 *Endocrinol Metab.* 2017 Sep 1;102(9):3172–3181.
- 345 52. Bonsignore MR, McNicholas WT, Montserrat JM, Eckel J. Adipose tissue in obesity and  
346 obstructive sleep apnoea. *Eur Respir J.* 2012 Mar;39(3):746–767.
- 347 53. Alvarez D, Hornero R, Abásolo D, del Campo F, Zamarrón C. Nonlinear characteristics of blood  
348 oxygen saturation from nocturnal oximetry for obstructive sleep apnoea detection. *Physiol Meas.* 2006  
349 Apr;27(4):399–412.
- 350 54. Senaratna CV, Perret JL, Lodge CJ, Lowe AJ, Campbell BE, Matheson MC, et al. Prevalence of  
351 obstructive sleep apnea in the general population: A systematic review. *Sleep Med Rev.* 2017  
352 Aug;34:70–81.
- 353 55. Fietze I, Laharnar N, Obst A, Ewert R, Felix SB, Garcia C, et al. Prevalence and association analysis  
354 of obstructive sleep apnea with gender and age differences - Results of SHIP-Trend. *J Sleep Res.* 2019  
355 Oct;28(5):e12770.

356 56. Chaudhary P, Goyal A, Goel SK, Kumar A, Chaudhary S, Kirti Keshri S, et al. Women with OSA  
357 have higher chances of having metabolic syndrome than men: effect of gender on syndrome Z in cross  
358 sectional study. *Sleep Med.* 2021 Mar;79:83–87.

359 57. Zhang X, Wang S, Xu H, Yi H, Guan J, Yin S. Metabolomics and microbiome profiling as  
360 biomarkers in obstructive sleep apnoea: a comprehensive review. *Eur Respir Rev.* 2021 Jun 30;30(160).

361

## 362 Supporting information

363

364 **S1 Table. Mapping between MESA and HCHS/SOL Metabolomics Platform.** The mapping was carried  
365 out before any quality control steps (e.g. assessment of missingness, etc.). 294 compounds in MESA  
366 were mapped to 231 metabolites in HCHS/SOL. 60 redundant features in MESA were dropped based on  
367 the principles described in the methods section. After discarding 12 metabolites with high  
368 missingness( $\geq 75\%$ ) in HCHS/SOL, 209 metabolites with low missingness ( $< 25\%$ ) were imputed and 10  
369 metabolites with medium missingness (25-75%) were dichotomized in the HCHS/SOL metabolomics  
370 platform. We applied the same QC steps to the corresponding metabolites in MESA, i.e., discarded,  
371 imputed, and dichotomized, the same metabolites in MESA as in HCHS/SOL.

372 **S2 Table. Characteristics of the analytic sample from the MESA study population.** \* Baseline  
373 hypertension is defined as systolic blood pressure (SBP)  $> 130$  mmHg, diastolic blood pressure (DBP)  $> 80$   
374 mmHg or any history of antihypertensive medication intake.

375 **S3 Table. Single metabolite associations with FDR-adjusted p-value  $< 0.05$  in HCHS/SOL and MESA.**  
376 Model 1 adjusted for age, gender, BMI, study center, and Hispanic/Latino background in HCHS/SOL, and  
377 adjusted for age, gender, BMI, study site (site WFU and UCLA are combined due to low cell count), and  
378 race in MESA. Model 2 adjusted for all covariates in model 1, in HCHS/SOL model 2 additionally adjusted  
379 for alcohol usage, smoking status, physical activity and diet; in MESA, model 2 additionally adjusted for  
380 alcohol usage and smoking status. Model 3 adjusted for all covariates in model 2, in HCHS/SOL, model 3



381 additionally adjusted for diabetes, hypertension, fasting glucose, fasting insulin, HOMA-IR, HDL, LDL,  
382 total cholesterol, triglycerides, systolic blood pressure, diastolic blood pressure; in MESA, model 3  
383 additionally adjusted for hypertension indicator, fasting glucose, HDL, LDL, cholesterol, triglycerides,  
384 systolic blood pressure and diastolic blood pressure. Metabolite with \* indicates they were identified  
385 based on accurate mass data, retention time and mass spectrometry but not reference standards.  
386 Therefore, the verification is not as robust as metabolites without \*.

387 **S4 Table. Estimated associations between OSA and AHI metabolite indices and their respective**  
388 **phenotypes in quartiles, in HCHS/SOL and MESA.** \* per 1 STD increase in metabolite index. Model 1  
389 adjusted for age, gender, BMI, study center, and Hispanic/Latino background in HCHS/SOL, and adjusted  
390 for age, gender, BMI, study site (site WFU and UCLA are combined due to low cell count), and race in  
391 MESA. Model 2 adjusted for all covariates in model 1, in HCHS/SOL model 2 additionally adjusted for  
392 alcohol usage, smoking status, physical activity and diet; in MESA, model 2 additionally adjusted for  
393 alcohol usage and smoking status. Model 3 adjusted for all covariates in model 2, in HCHS/SOL, model 3  
394 additionally adjusted for diabetes, hypertension, fasting glucose, fasting insulin, HOMA-IR, HDL, LDL,  
395 total cholesterol, triglycerides, systolic blood pressure, diastolic blood pressure; in MESA, model 3  
396 additionally adjusted for hypertension indicator, fasting glucose, HDL, LDL, cholesterol, triglycerides,  
397 systolic blood pressure and diastolic blood pressure.

398
